# Supplementary material
Source: PubMed Central journal article supplement (PMC2373271)
Supplement: NIHMS37174-supplement-supplement.pdf [file NIHMS37174-supplement-supplement.pdf]

## SUPPLEMENTARY FIGURE LEGENDS

### Supplementary Figure 1. Time course of adenoma development in *Apc*<sup>Min/+</sup> and *Klf4*<sup>+/-</sup>/*Apc*<sup>Min/+</sup> mice.

Panels **(A)**, **(C)**, and **(E)** compare the number of adenomas per mouse developed in the small intestine (SI) between *Apc*<sup>Min/+</sup> and *Klf4*<sup>+/-</sup>/*Apc*<sup>Min/+</sup> mice at 10, 16, and 20 weeks, respectively. Panels **(B)**, **(D)**, and **(F)** compare the number of adenomas developed in the large intestine (LI) at 10, 16 and 20 weeks, respectively, between *Apc*<sup>Min/+</sup> and *Klf4*<sup>+/-</sup>/*Apc*<sup>Min/+</sup> mice. \*  $p < 0.05$  and \*\*  $p < 0.01$  by two-tailed *t*-test between the two genotypes.

### Supplementary Figure 2. Size distribution of adenomas developed in *Apc*<sup>Min/+</sup> and *Klf4*<sup>+/-</sup>/*Apc*<sup>Min/+</sup> mice.

Panel **(A)** shows the size distribution of adenomas developed in the small intestine at 10, 16 and 20 weeks, respectively, in *Apc*<sup>Min/+</sup> and *Klf4*<sup>+/-</sup>/*Apc*<sup>Min/+</sup> mice. Double-headed arrows indicate significant difference between the two groups ( $p < 0.01$ ). Panel **(B)** is the size distribution of adenomas developed in the large intestine at 10, 16 and 20 weeks, respectively, in the two groups of mice.

### Supplementary Figure 3. *Klf4* mRNA decreases as adenoma size increases.

**(A)** Adenomas of various sizes as indicated in the figure and neighboring normal tissues were micro-dissected from intestines of *Apc*<sup>Min/+</sup> and *Klf4*<sup>+/-</sup>/*Apc*<sup>Min/+</sup> mice. RNA was extracted and mRNA levels were analyzed by semi-quantitative RT-PCR. Adenomas sizes were <1 mm (lanes 2 & 6), 1-3 mm (lanes 3 & 7), and >3 mm (lanes 4 & 8). Normal tissues (NI) were also included in the analysis (lanes 1 & 5). **(B)** Densitometric quantification of the amplified *Klf4* bands shown in **(A)** after normalizing to  $\beta$ -actin. N =6; \*  $p < 0.01$  compared to *Apc*<sup>Min/+</sup> mice.

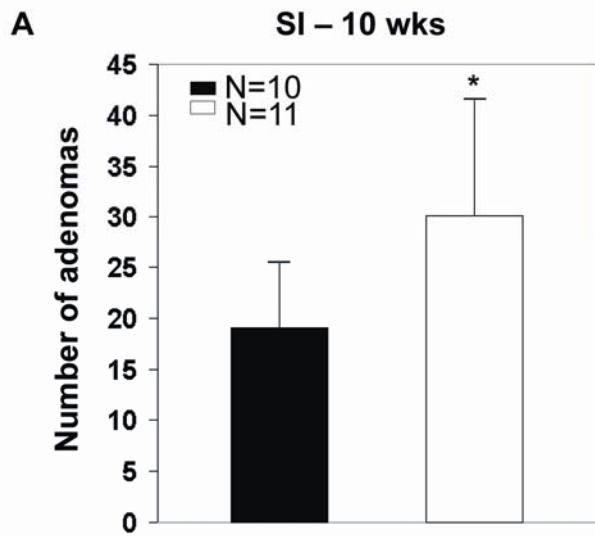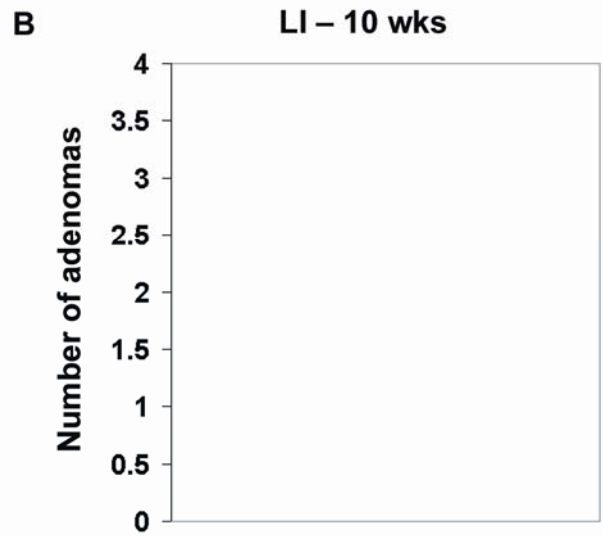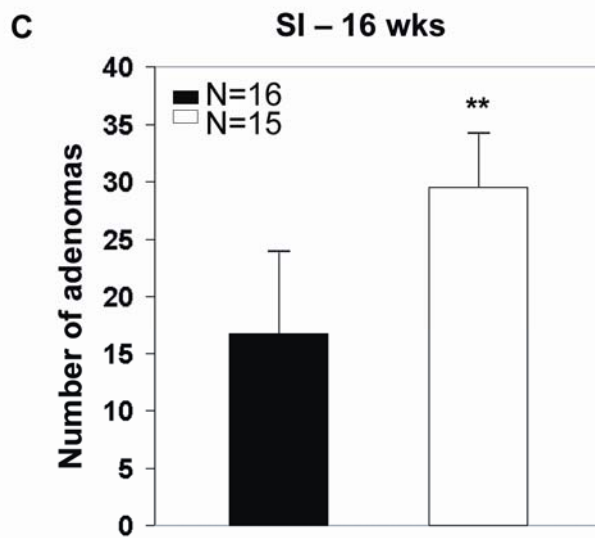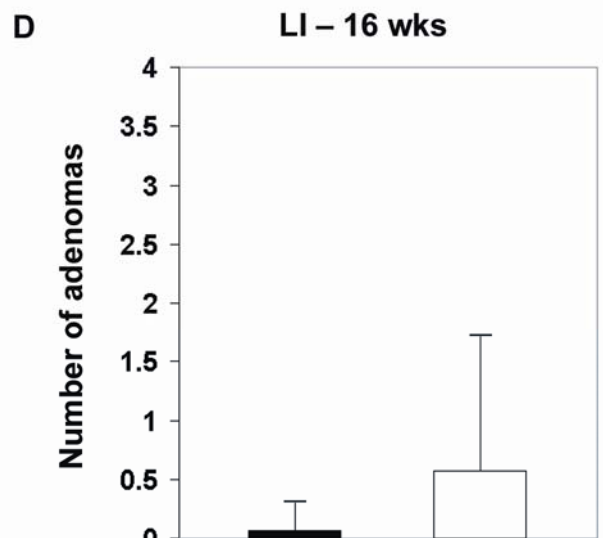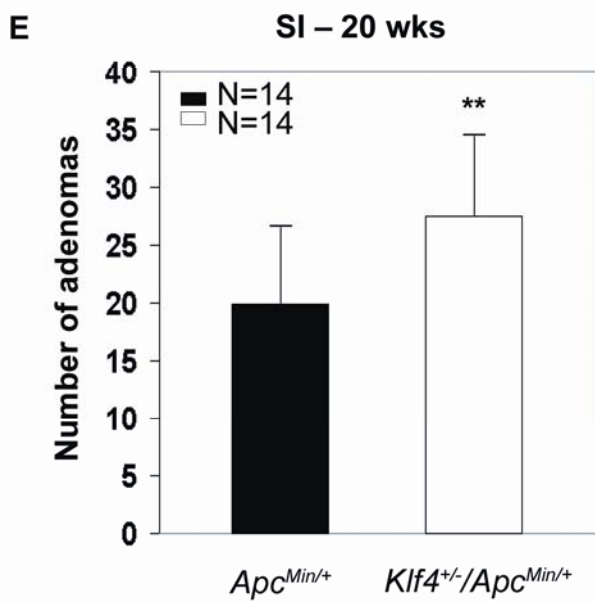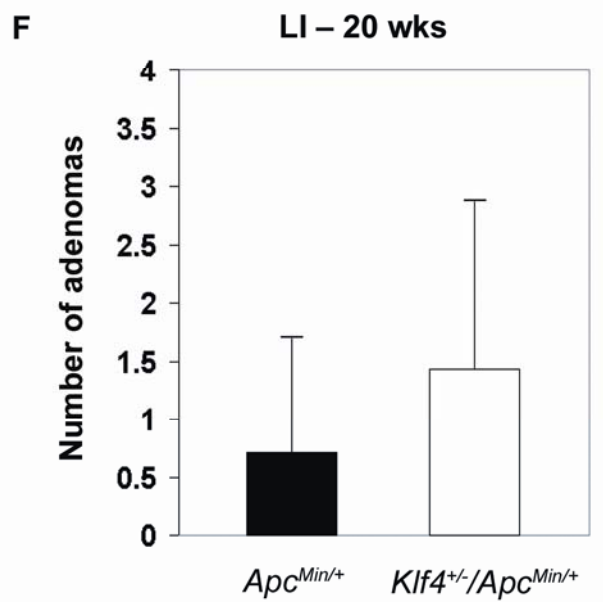

Supplementary Figure 1 – Ghaleb et al.

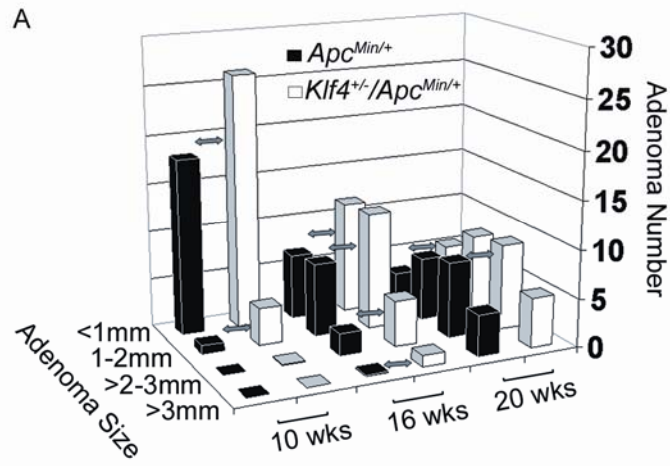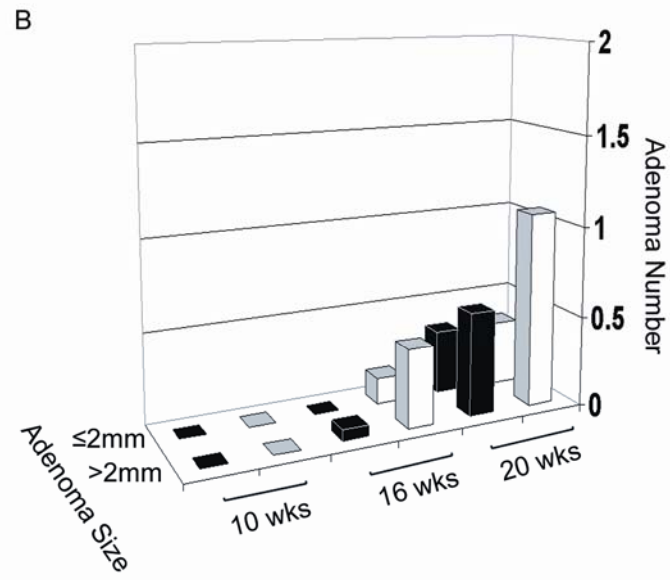

**Supplementary Figure 2 – Ghaleb *et al.***

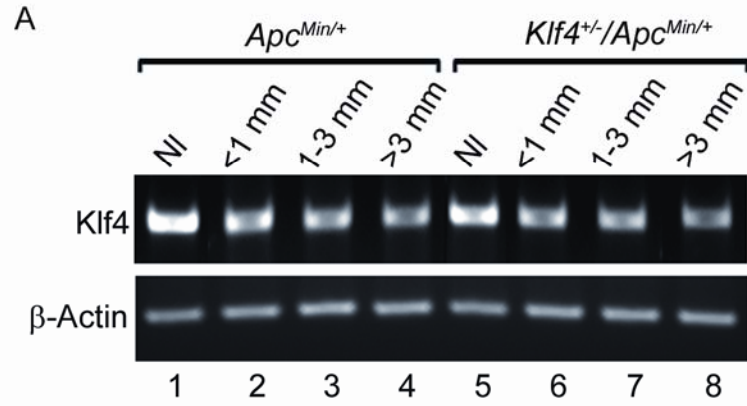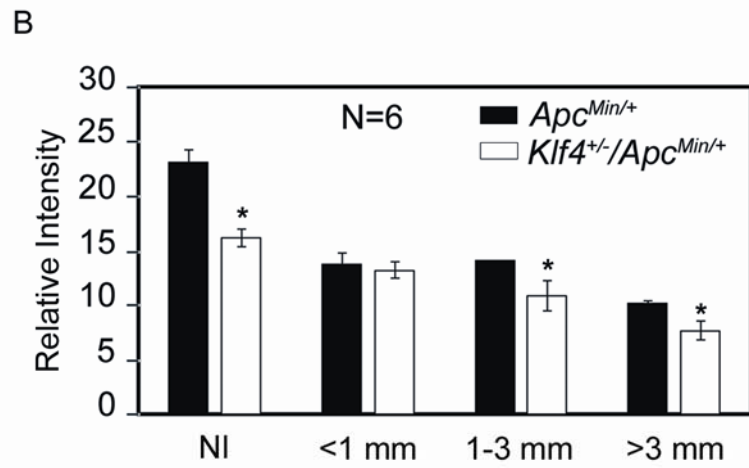

Supplementary Figure 3 – Ghaleb *et al.*
